# Supplementary material
Source: ML conference proceedings conference paper supplement (https://proceedings.neurips.cc/paper_files/paper/2023/hash/020ad0ac6a1974e6748e4a5a48110a07-Abstract.html)

## A Llama

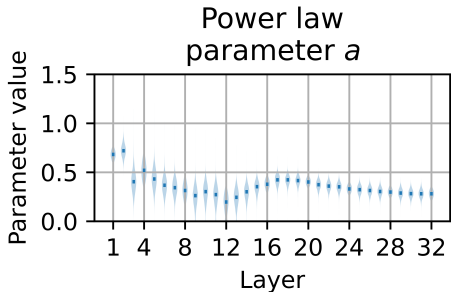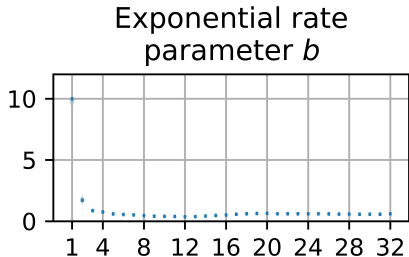

## B roBERTa

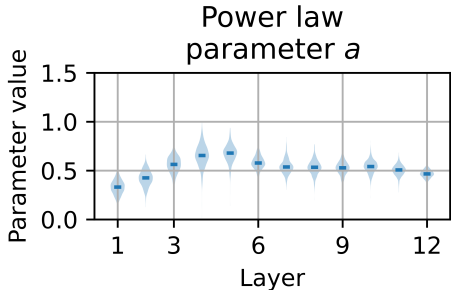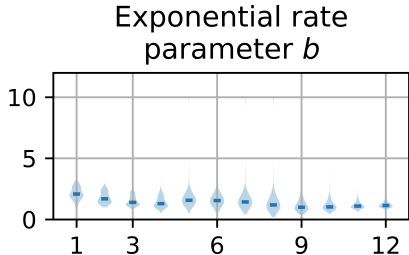

Supplement: Supplementary file 1 [file 020ad0ac6a1974e6748e4a5a48110a07-Supplemental-Conference.pdf]
